# Supplementary material for: Construction of a vertically arrayed three-dimensional composite structure as a high coloration efficiency electrochromic film
Source: Royal Society of Chemistry journal article supplement (doi:10.1039/d0nj00331j), 2020-01-01
Supplement: d0nj00331j1.pdf [file d0nj00331j1.pdf]

## Supplement files

ARTICLE

### Construction of vertical arrayed three-dimension composite towards high coloration efficiency electrochromic film

Received 00th January 20xx,  
Accepted 00th January 20xx

Xiaoshu Qu,<sup>\*a</sup> Chao Ma,<sup>a</sup> Yu Fu,<sup>a</sup> Shuping Liu<sup>b</sup>, Jie Wang,<sup>a</sup> Yanyan Yang<sup>a</sup>

DOI: 10.1039/x0xx00000x

a. College of Chemical and Pharmaceutical Engineering, Jilin Institute of Chemical Technology, Jilin City, 132022, P. R. China. E-mail: xiaoshuqu@jlict.edu.cn

b. College of Tourism and Cuisine, Chemistry Center, Harbin University of Commerce, Harbin 150076, P. R. China.

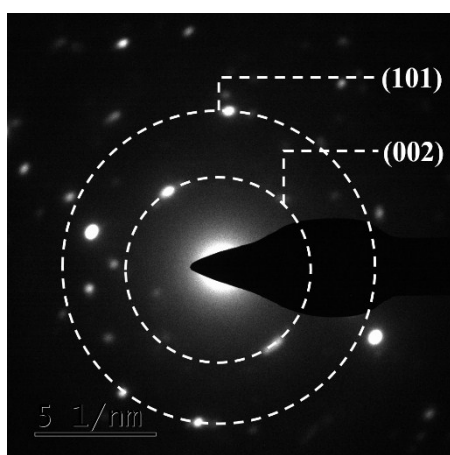

Figure S1. SAED pattern images of the prepared  $\text{TiO}_2$  nanowires.

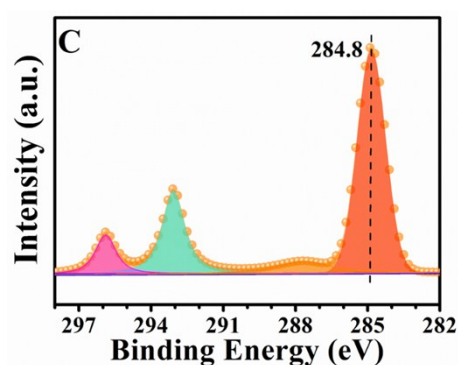

Figure S2. High-resolution XPS spectra for C 1s of prepared composite film.

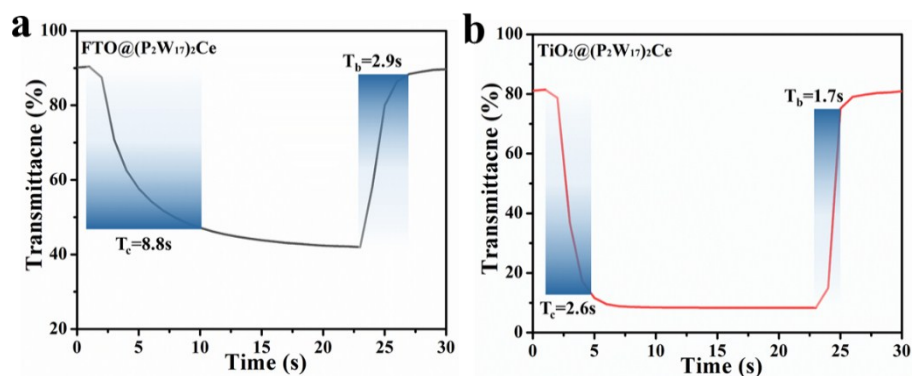

Figure S3. Coloration/bleaching time extracted for a 90% transmittance change for the prepared electrochromic films.

**Table S1.** Comparison of electrochromic performances of inorganic-based EC materials.

| Number | EC Materials                                                                                                                                                                | $\Delta T^a/(\Delta A)^b$ | tc/tb (s) <sup>c</sup> | CE (cm <sup>2</sup> C <sup>-1</sup> ) <sup>d</sup> | Ref.        |
|--------|-----------------------------------------------------------------------------------------------------------------------------------------------------------------------------|---------------------------|------------------------|----------------------------------------------------|-------------|
| 1      | PSS/PAH/(P <sub>2</sub> W <sub>15</sub> /PAH)                                                                                                                               | (0.25)                    | 5.5/6.0                |                                                    | 1           |
| 2      | PSS/Fe(phen) <sub>3</sub> /(P <sub>2</sub> W <sub>17</sub> /Fe(phen) <sub>3</sub> );<br>PSS/Cu(phen) <sub>2</sub> /(P <sub>2</sub> W <sub>17</sub> /Cu(phen) <sub>2</sub> ) | (0.22);<br>(0.24)         | 7.4/7.0;<br>6.6/6.5    |                                                    | 2           |
| 3      | TiO <sub>2</sub> /P <sub>2</sub> W <sub>17</sub> V                                                                                                                          | 85.1%                     | 5.6/4.1                | 67.7                                               | 3           |
| 4      | TiO <sub>2</sub> /W <sub>10</sub>                                                                                                                                           | 49.5%                     | 7.2/4.9                |                                                    | 4           |
| 5      | TiO <sub>2</sub> /Na-P <sub>5</sub> W <sub>30</sub>                                                                                                                         | 50%                       | 1/1                    | 71.1                                               | 5           |
| 6      | TiO <sub>2</sub> /(P <sub>2</sub> W <sub>18</sub> /PEI)                                                                                                                     | 45.1%                     | 1.9/6.7                | 69                                                 | 6           |
| 7      | PEI/P <sub>2</sub> W <sub>18</sub> /PEI/WO <sub>3</sub>                                                                                                                     | 48.4%                     | 24.9/2.4               | 46.1                                               | 7           |
| 8      | P <sub>2</sub> W <sub>18</sub> /CS-CNTs                                                                                                                                     | 20.3%                     | 4.3/3.7                | 91.5                                               | 8           |
| 9      | Ag/W <sub>18</sub> O <sub>49</sub>                                                                                                                                          | 58-86%                    | 1.3/1.4-<br>9/12.3     | 32.67-35.7                                         | 9           |
| 10     | Nb-doped WO <sub>3</sub>                                                                                                                                                    | 61.7%                     | 3.6/2.1                | 49.7                                               | 10          |
| 11     | WO <sub>3</sub>                                                                                                                                                             | 75.6%                     | 2.4/1.2                | 79.7                                               | 11          |
| 12     | Co ions doped WO <sub>3</sub>                                                                                                                                               | 75.4%                     | 27.6/11.8              | 65.7                                               | 12          |
| 13     | Prussian Blue                                                                                                                                                               | (2.35)                    | 8.3/5.6                |                                                    | 13          |
| 14     | TiO <sub>2</sub> / WO <sub>3</sub>                                                                                                                                          | 85.3%                     | 3.0/1.1                | 102.1                                              | 14          |
| 15     | TiO <sub>2</sub> /(P <sub>2</sub> W <sub>17</sub> ) <sub>2</sub> Ce                                                                                                         | 73.2%                     | 2.6/1.7                | 111.3                                              | Our<br>work |

*a*: transmittance; *b*: Absorbance; *c*: Switching time( $t_{\text{coloration}}/t_{\text{bleaching}}$ ); *d*: Coloration effect

#### References:

1. G. G. Gao, L. Xu, W. Wang, Z. Wang, Y. Qiu and E. B. Wang, Electrochromic multilayer films based on trilacunary Dawson-type polyoxometalate, *Electrochim. Acta.*, 2005, **50**, 1101–1106.
2. G. G. Gao, L. Xu, W. Wang, W. An, Y. Qiu, Z. Wang and E. B. Wang, Electrochromic Multilayer Films of Tunable Color by Combination of Copper or Iron Complex and Monolacunary Dawson-Type Polyoxometalate, *J. Phys. Chem. B.*, 2005, **109**, 8948–8953.

3. L. Liu, S. M. Wang, C. Li, C. G. Liu, C. L. Ma and Z. B. Han, *J. Mater. Chem. C.*, 2015, **3**, 5175–5182.
4. Z. Kim, Q. C. Guo, S. M. Wang, Q. Wu and Z. B. Han, *Thin Solid Films.*, 2017, **639**, 1–6.
5. S. M. Wang, L. Liu, W. L. Chen, Z. M. Zhang, Z. M. Su and E. B. Wang, A new electrodeposition approach for preparing polyoxometalates-based electrochromic smart windows. *J. Mater. Chem. A.*, 2013, **1**, 216–220.
6. S. P. Liu and X. S. Qu, Construction of nanocomposite film of Dawson-type polyoxometalate and TiO<sub>2</sub> nanowires for electrochromic applications. *Appl. Surf. Sci.*, 2017, **412**, 189–195.
7. S. Liu, Layer-by-layer assembled WO<sub>3</sub> and tungstophosphate nanocomposite with enhanced electrochromic properties. *J. Mater. Sci.: Mater. Electron.*, 2016, **27**, 11118–11125.
8. S. Liu, L. Xu, F. Li, W. Guo, Y. Xing and Z. Sun, Carbon nanotubes-assisted polyoxometalate nanocomposite film with enhanced electrochromic performance. *Electrochim. Acta.*, 2011, **56**, 8156–8162.
9. J. L. Wang, Y. R. Lu, H. H. Li, J. W. Liu, and S. H. Yu, Large Area Co-Assembly of Nanowires for Flexible Transparent Smart Windows, *J. Am. Chem. Soc.*, 2017, **139**, 9921–9926.
10. W. Q. Wang, X. L. Wang, X. H. Xia, Z. J. Yao, Y. Zhong, and J. P. Tu, Enhanced electrochromic and energy storage performance in mesoporous WO<sub>3</sub> film and its application in bi-functional smart window, *Nanoscale*, 2018, **10**, 8162–8169.
11. W. Q. Wang, Z. J. Yao, X. L. Wang, X. H. Xia, C. D. Gu, J. P. Tu, Niobium doped tungsten oxide mesoporous film with enhanced electrochromic and electrochemical energy storage properties, *J. Colloid. Interf. Sci.*, 2019, **535**, 300–307.
12. K. Shen, K. Sheng, Z. T. Wang, J. M. Zheng, C. Y. Xu, Cobalt ions doped tungsten oxide nanowires achieved vertically aligned nanostructure with enhanced electrochromic properties, *Appl. Surf. Sci.*, 2020.

13. J. Chu, X. Li, Y. P. Cheng, S. X. Xiong, Electrochromic properties of Prussian Blue nanocube film directly grown on FTO substrates by hydrothermal method, *Mater. Lett.*, 2020, **258**, 126782.
14. K. Tang, Y. Zhang, Y. D. Shi, J. W. Cui, X. Shu, Y. Wang, Y. Q. Qin, J. Q. Liu, H. H. Tan, Y. C. Wu, Fabrication of WO<sub>3</sub>/TiO<sub>2</sub> core-shell nanowire arrays: Structure design and high electrochromic performance, *Electrochimi. Acta.*, 2020.
